# Supplementary material
Source: publisher figshare collection journal article supplement (https://sage.figshare.com/ndownloader/files/17343146)
Supplement: Supplementary file 1 [file 17343146]

**Supplementary Table:** Mean and SD values of the two flow subscales (*fluency of performance* and *absorption by activity*) and the individual flow items for each rhythmic complexity group (low, medium, and high complexity). Ratings given after both tapping blocks were combined.

|                        | Low complexity rhythms |      | Medium complexity rhythms |      | High complexity rhythms |      |
|------------------------|------------------------|------|---------------------------|------|-------------------------|------|
|                        | Mean                   | SD   | Mean                      | SD   | Mean                    | SD   |
| Fluency of performance | 5.37                   | 0.74 | 5.22                      | 0.78 | 5.04                    | 1.08 |
| Absorption by activity | 4.99                   | 0.93 | 4.56                      | 0.86 | 5.10                    | 0.78 |
| Item 01                | 5.10                   | 1.22 | 4.44                      | 1.14 | 5.02                    | 1.13 |
| Item 02                | 5.36                   | 1.04 | 5.13                      | 0.98 | 4.81                    | 1.57 |
| Item 03                | 5.26                   | 1.32 | 4.94                      | 1.25 | 5.35                    | 1.14 |
| Item 04                | 5.12                   | 1.06 | 4.81                      | 0.84 | 4.88                    | 1.30 |
| Item 05                | 4.93                   | 1.14 | 4.73                      | 1.03 | 4.71                    | 1.62 |
| Item 06                | 5.64                   | 1.04 | 5.13                      | 1.11 | 5.52                    | 1.05 |
| Item 07                | 5.31                   | 1.11 | 5.19                      | 1.15 | 5.10                    | 1.24 |
| Item 08                | 5.79                   | 0.92 | 5.75                      | 1.01 | 5.58                    | 1.22 |
| Item 09                | 5.69                   | 0.94 | 5.71                      | 1.19 | 5.15                    | 1.23 |
| Item 10                | 3.98                   | 1.16 | 3.73                      | 1.09 | 4.50                    | 1.29 |

Item 01: I feel just the right amount of challenge. ^

Item 02: My thoughts/activities run fluidly and smoothly. \*

Item 03: I don't notice time passing. ^

Item 04: I have no difficulty concentrating. \*

Item 05: My mind is completely clear. \*

Item 06: I am totally absorbed in what I am doing. ^

Item 07: The right thoughts/movements occur of their own accord. \*

Item 08: I know what I have to do each step of the way. \*

Item 09: I feel that I have everything under control. \*

Item 10: I am completely lost in thought. ^

^ Absorption by activity

\* Fluency of performance
